# Supplementary material for: Should primary anastomosis be considered more? A retrospective analysis of anastomotic complications in young children
Source: HighWire-hosted journal article supplement (doi:10.1136/wjps-2023-000565), 2023-08-01
Supplement: wjps-2023-000565supp001_data_supplement.pdf [file wjps-2023-000565supp001_data_supplement.pdf]

## Appendix A – Diagnosis included

| Primary diagnosis                   | Count (N)  | Percentage of total (%) |
|-------------------------------------|------------|-------------------------|
| Intestinal atresia                  | 143        | 30.0                    |
| Hirschsprung's disease              | 139        | 29.1                    |
| Necrotizing enterocolitis           | 67         | 14.0                    |
| Meckel's diverticulum               | 18         | 3.8                     |
| Duplication cyst                    | 14         | 2.9                     |
| Invagination (intussusception)      | 14         | 2.9                     |
| Spontaneous intestinal perforation  | 12         | 2.5                     |
| Volvulus                            | 12         | 2.5                     |
| Choledochal cyst                    | 12         | 2.5                     |
| Congenital biliary atresia          | 10         | 2.1                     |
| Malrotation                         | 9          | 1.9                     |
| Meconium ileus                      | 5          | 1.0                     |
| Omphalo-enteric duct                | 4          | .8                      |
| Omphalocele                         | 3          | .6                      |
| Feeding difficulties                | 3          | .6                      |
| Meconium peritonitis                | 3          | .6                      |
| Inguinal hernia                     | 3          | .6                      |
| Appendicitis                        | 1          | .2                      |
| Diaphragmatic hernia                | 1          | .2                      |
| Gastroschisis                       | 1          | .2                      |
| Esophageal atresia (fundoplication) | 1          | .2                      |
| Annular pancreas                    | 1          | .2                      |
| Iatrogenic damage during surgery    | 1          | .2                      |
| <b>Total</b>                        | <b>477</b> | <b>100.0</b>            |
